# Supplementary material
Source: Springer Nature journal article supplement (https://www.springermedizin.de/resource/supplementary/13041_2009_75_MOESM2_ESM.pdf/25657466)

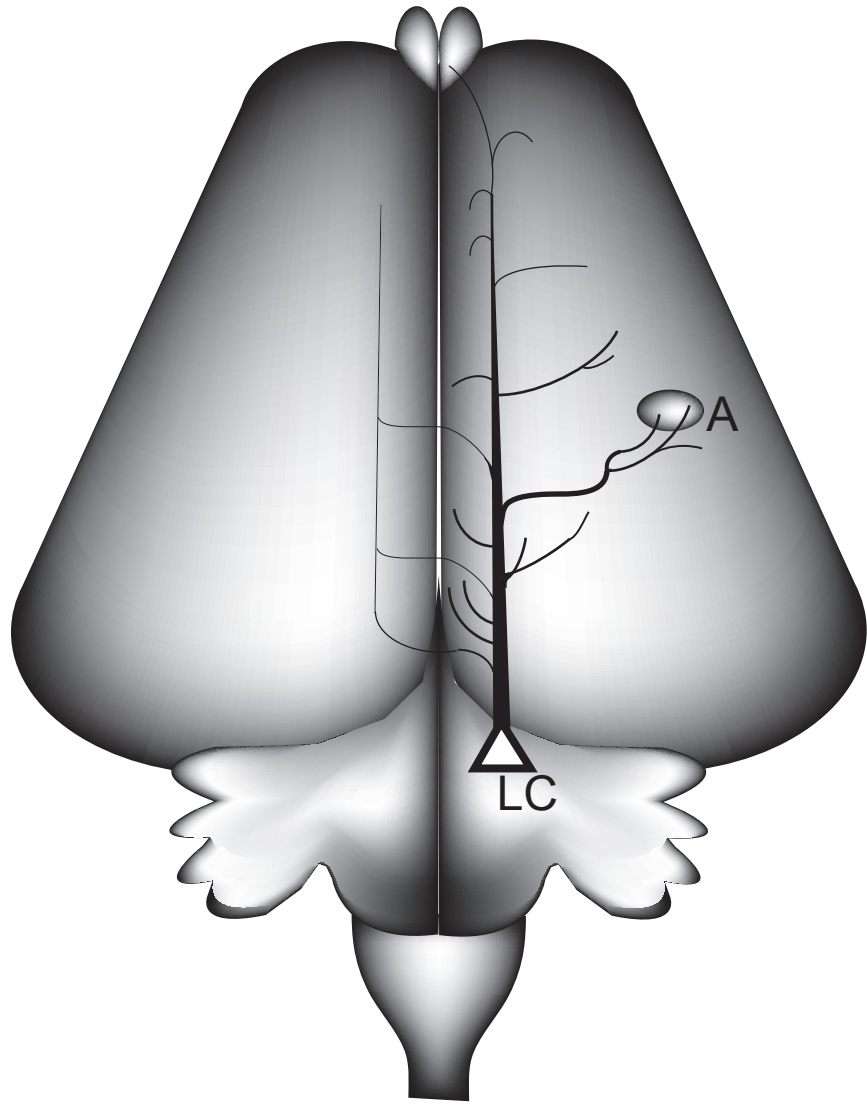

Figure 2

Supplement: MOESM2 [file 25657466]
